# Supplementary material for: Triple optically modulated and enzymatically responsive organic afterglow materials for dynamic anti-counterfeiting
Source: Royal Society of Chemistry journal article supplement (doi:10.1039/d2qm00235c), 2022-01-01
Supplement: d2qm00235c1.pdf [file d2qm00235c1.pdf]

## Supporting Information

### **Triple Optically Modulated and Enzymatically Responsive Organic Afterglow Materials for Dynamic Anti-counterfeiting**

Haijiang Qiu <sup>a,b</sup>, Wensong Wang <sup>a,b</sup>, Hongrui Cheng <sup>a,b</sup>, Yongfeng Lu <sup>a,b</sup>, Min Li <sup>a,b</sup>, Haixin Chen <sup>a,b</sup>, Xiao Fang <sup>a,b</sup>,  
Cheng Jiang <sup>\*c,d</sup> and Yuanhui Zheng <sup>\*a,b</sup>

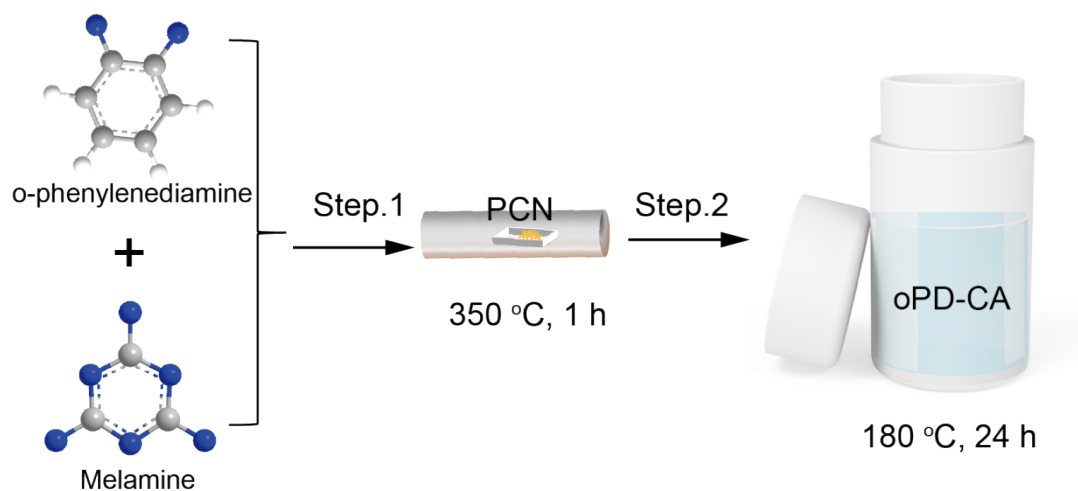

**Scheme S1.** Illustration of the oPD-CA system. Step.1. preparation of the precursor PCN by thermal polymerization. Step.2. preparation of the phosphorescence material oPD-CA by hydrothermal method.

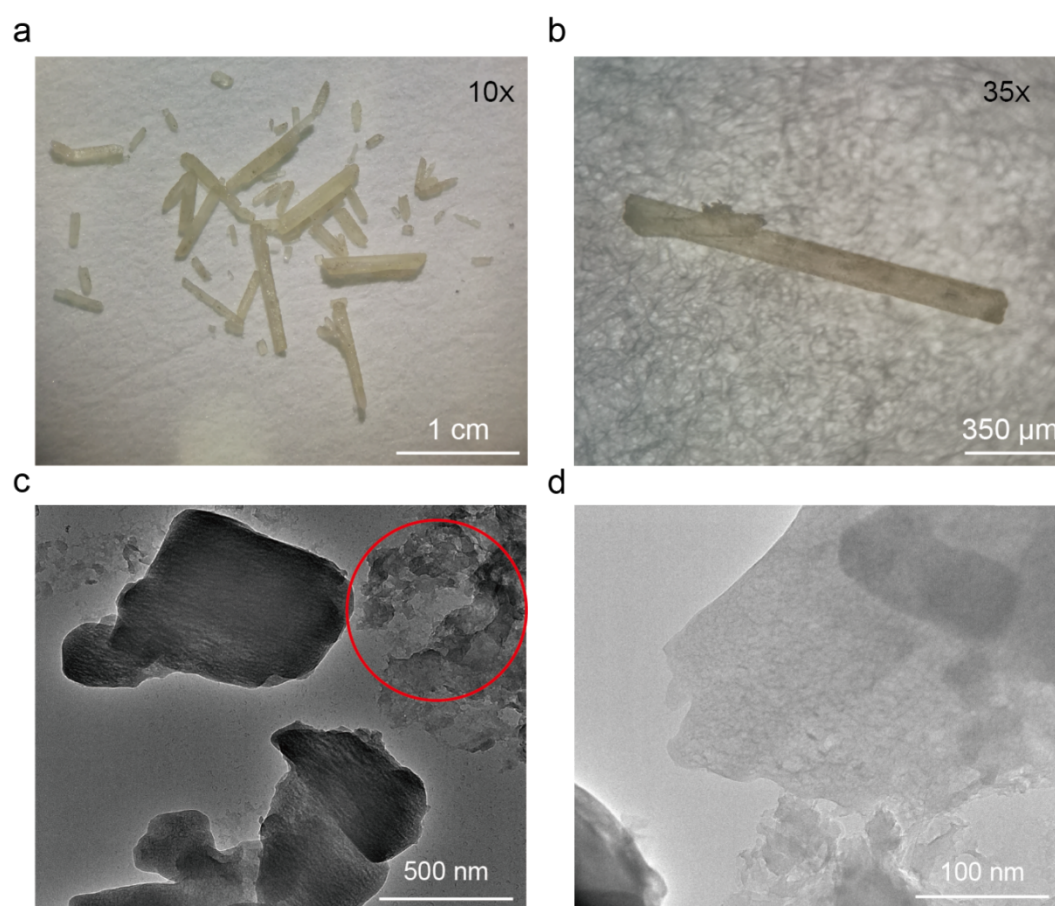

**Fig. S1** Photographs of the oPD-CA taken by optical microscope, a) 10× and b) 35×. Typical transmission electron microscopy (TEM) images of oPD-CA after grinding, c) 500 nm and d) 100 nm.

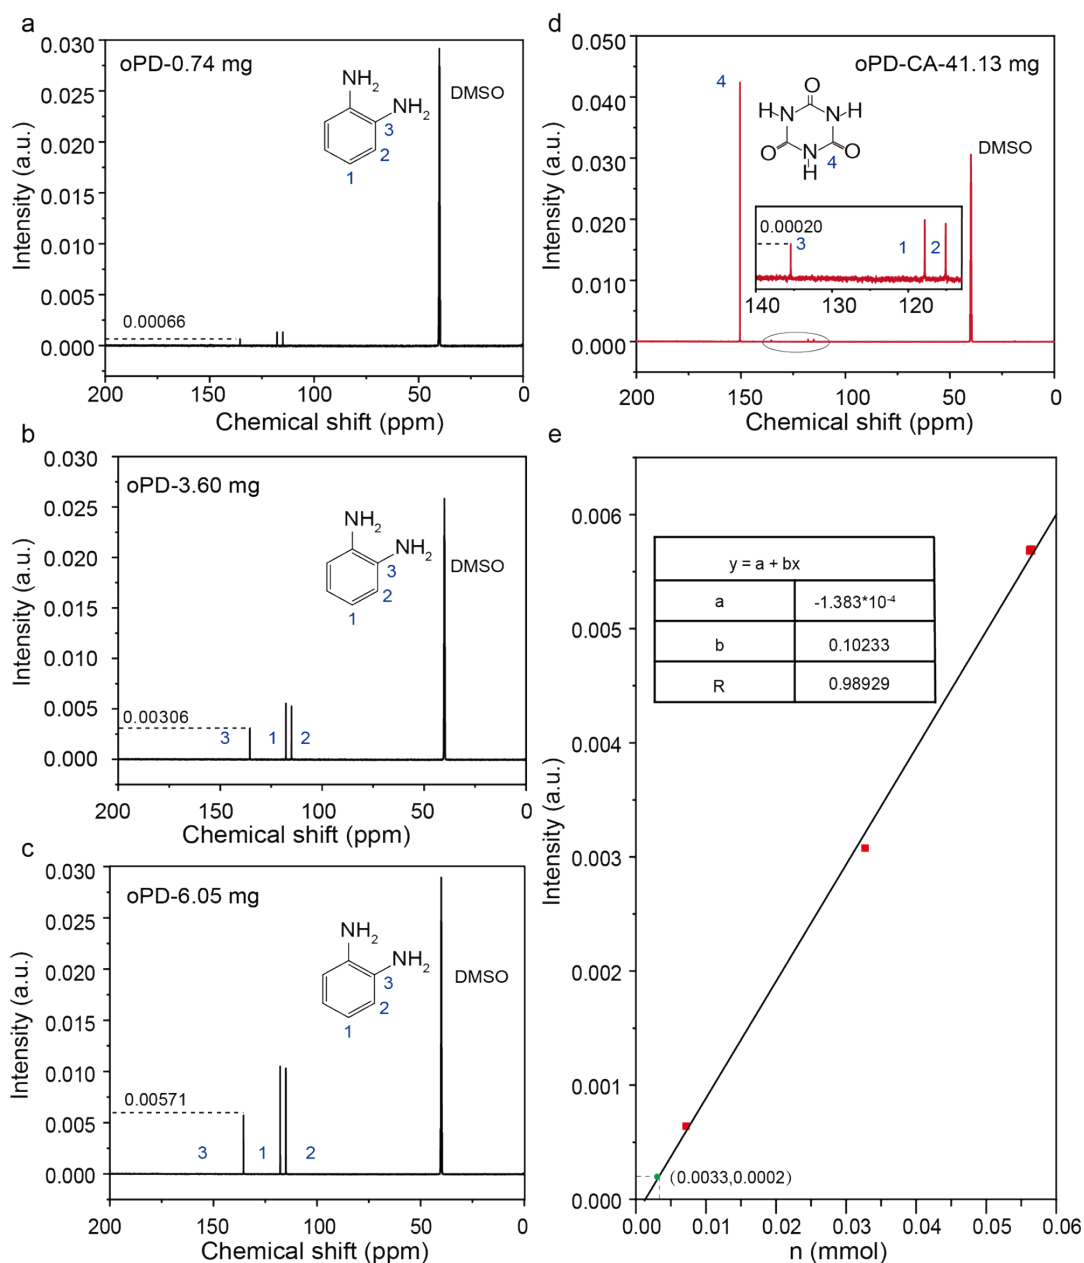

**Fig. S2** The calculation of experimental molecular doping by external standard method. a)  $^{13}\text{C}$ -NMR spectra of oPD-0.74 mg, b) oPD-3.60 mg, c) oPD-6.05mg, and d) oPD-CA-41.13 mg.

Dissolve 0.74 mg, 0.033 mmol, 3.6 mg, 0.056 mmol, and 6.05 mg o-phenylenediamine (oPD) and 41.13 mg oPD-CA in 0.55 ml Methyl sulfoxide- $d_6$  (DMSO- $d_6$ ), respectively. The result  $^{13}\text{C}$ -NMR were shown in the **Fig. S2a-d**. The concentration-intensity relationship curve of oPD was obtained (**Fig. S2e**), through the results in **Fig. S2a-c**. The actual doping amount of oPD in cyanuric acid was calculated by the external standard method. The experimental oPD doping concentration calculated is 0.0033 mmol (from 41.13 mg oPD-CA). The remaining cyanuric acid base is 0.3161 mmol from the above results. Hence, the experimental molecular doping concentration calculated is 96:1 (molar ratio of CA : oPD).

**Note S1.** The calculation of the relative intensity of hydrogen bond.

$$I_R = \frac{I_{\text{hydrogen bond}} - I_{C=O}}{I_{C=O}} \times 100\% \quad (1)$$

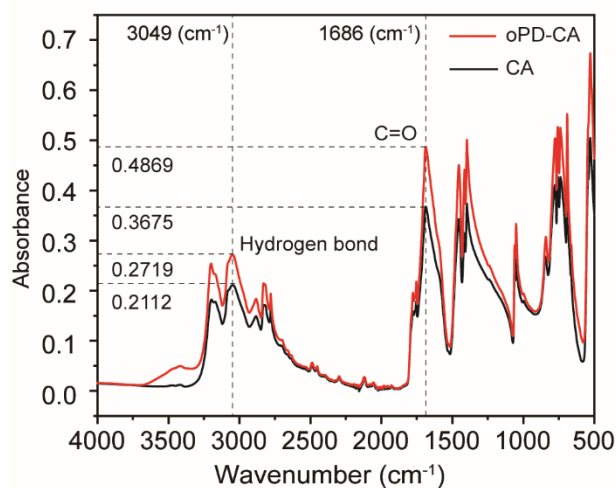

**Fig. S3** FTIR absorbance spectra of as-synthesized oPD-CA and pristine CA.

In the **Equation (1)**,  $I_R$  represent the relative intensity of hydrogen bond.  $I_{\text{hydrogen bond}}$  and  $I_{C=O}$  represent the intensity of hydrogen bond and C=O recorded by Nicolet iS50 FT/IR Spectrophotometer, respectively. For oPD-CA, the absorption of hydrogen bond and C=O at 3049 and 1686  $\text{cm}^{-1}$  is 0.2719 and 0.4868, respectively (**Fig. S3**). For CA, the transmittance of hydrogen bond and C=O at 3049 and 1686  $\text{cm}^{-1}$  is 0.2112 and 0.3675, respectively (**Fig. S3**). (The test condition of CA is consistent with that of oPD-CA). The results show that  $I_{R-\text{oPA-CA}}=44.15\% > I_{R-\text{CA}}=42.53\%$ .

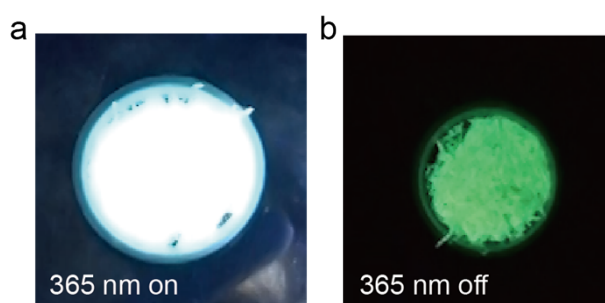

**Fig. S4** Optical images of the catechol-CA powder in air under UV lamp (365 nm) on (left column) and off (right column).

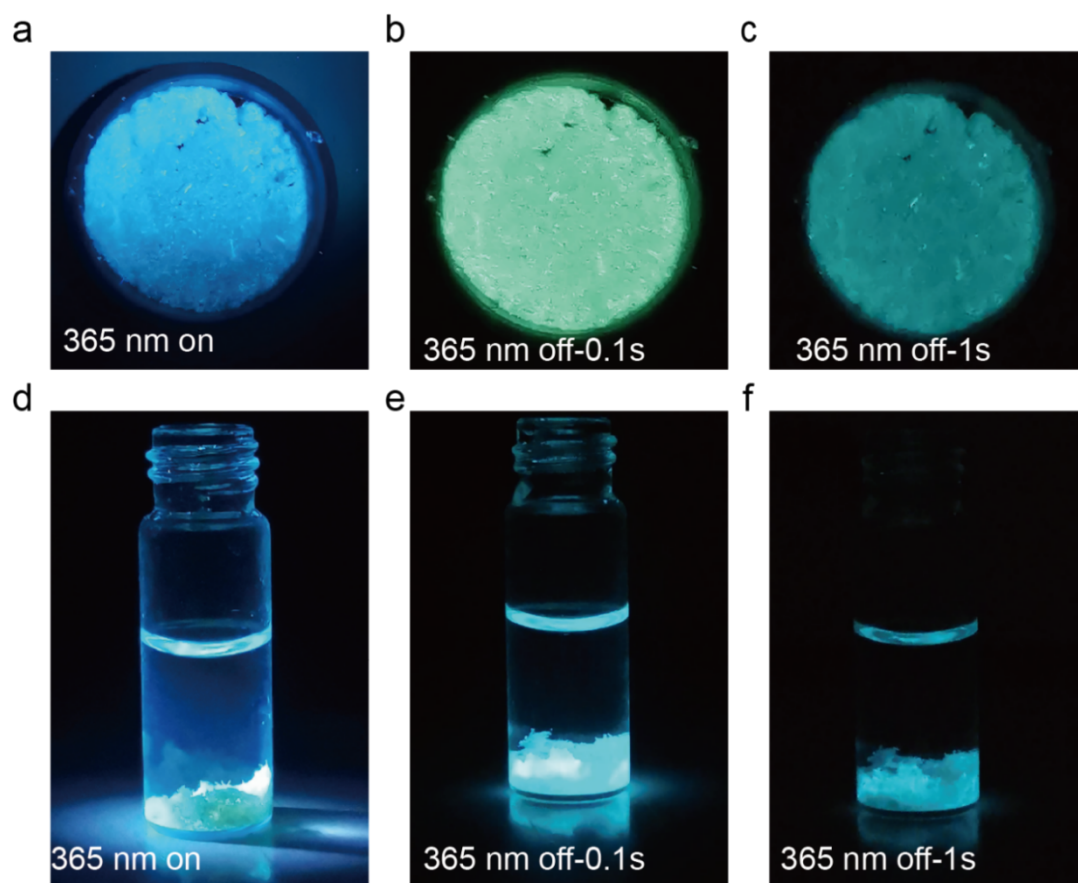

**Fig. S5** Optical images of the oPD-CA powder in air (top row) and in water (bottom row) under UV lamp (365 nm) on (left column), off-0.1 s (middle) and off-1s (right column).

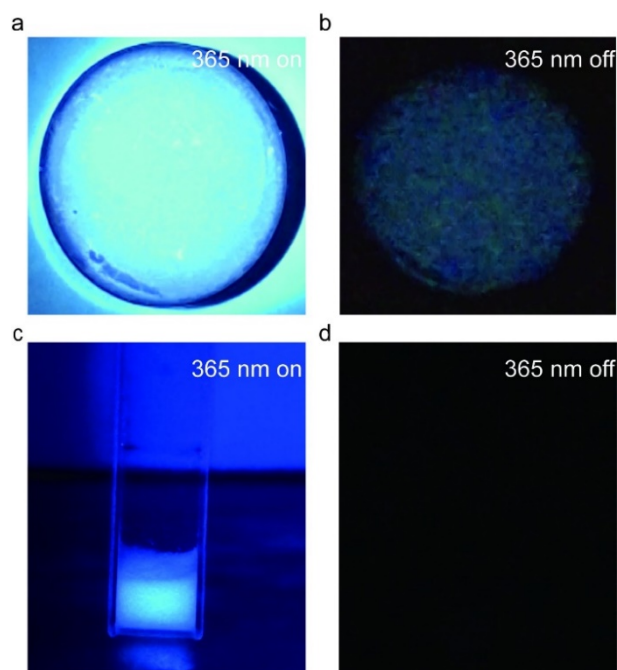

**Fig. S6** Optical images of the CA powder in air (top row) and in water (bottom row) under UV lamp (365 nm) on (left column) and off (right column).

**Table S1.** Photoluminescence efficiency ( $\Phi_{\text{total}}$ ), fluorescence quantum yield and phosphorescence quantum yield of oPD-CA.

| Componud              | $\Phi_1$ (%) | $\Phi_2$ (%) | $\Phi_3$ (%) | $\Phi_4$ (%) | $\Phi_5$ (%) | $\Phi_{\text{avg.}}$ (%) |
|-----------------------|--------------|--------------|--------------|--------------|--------------|--------------------------|
| $\Phi_{\text{total}}$ | 24.6         | 24.6         | 24.8         | 24.7         | 24.7         | 24.7                     |
| FQY                   | 10.5         | 10.5         | 10.6         | 10.5         | 10.5         | 10.5                     |
| PQY                   | 14.1         | 14.1         | 14.2         | 14.2         | 14.2         | 14.2                     |

**Table S2.** Phosphorescence lifetimes ( $\tau$ ) of oPD-CA, depend on excitation temperature (Ex=365 nm, Em=419 nm), corresponding to **Fig 3c**.

| Em(nm) | T(K) | $A_1$ | $\tau_1$ (ms) | $A_2$ | $\tau_2$ (ms) | $A_3$ | $\tau_3$ (ms) | $r^2$ |
|--------|------|-------|---------------|-------|---------------|-------|---------------|-------|
| 419    | 110  | 877.6 | 0.7           | 74.4  | 5.3           | 6.5   | 39.3          | 1.12  |
| 419    | 230  | 279.7 | 3.4           | 25.3  | 27.9          | 15.6  | 132.6         | 1.17  |
| 419    | 273  | 218.2 | 2.9           | 62.7  | 39.4          | 27.2  | 149.0         | 1.11  |

**Table S3.** Phosphorescence lifetimes ( $\tau$ ) of oPD-CA, depend on excitation temperature (Ex=365 nm, Em=450 nm, Em=503 nm and Em=533 nm), corresponding to **Fig 3d-f**.

| Em(nm) | T(K) | $A_1$ | $\tau_1$ (ms) | $A_2$ | $\tau_2$ (ms) | $A_3$ | $\tau_3$ (ms) | $r^2$ |
|--------|------|-------|---------------|-------|---------------|-------|---------------|-------|
| 450    | 110  | 622.2 | 148.5         | 314.6 | 1216.1        | 323.1 | 1216.0        | 0.98  |
| 450    | 230  | 750.6 | 150.0         | 381.3 | 1052.3        | 398.4 | 1052.4        | 0.99  |
| 450    | 273  | 839.2 | 133.4         | 352.1 | 992.4         | 407.7 | 992.6         | 0.98  |

|     |     |        |       |       |        |       |        |      |
|-----|-----|--------|-------|-------|--------|-------|--------|------|
| 503 | 110 | 1209.7 | 127.4 | 535.9 | 1088.3 | 55.7  | 2770.7 | 0.99 |
| 503 | 230 | 1061.7 | 135.9 | 299.9 | 1114.4 | 366.2 | 1114.2 | 0.99 |
| 503 | 273 | 1102.8 | 130.9 | 254.7 | 1037.4 | 384.1 | 1037.4 | 0.99 |
| 533 | 110 | 1623.8 | 122.4 | 417.5 | 122.4  | 301.5 | 997.3  | 0.99 |
| 533 | 230 | 1036.8 | 115.1 | 534.8 | 115.1  | 291.9 | 984.2  | 0.99 |
| 533 | 273 | 1195.6 | 105.8 | 492.6 | 105.7  | 283.6 | 894.1  | 0.99 |

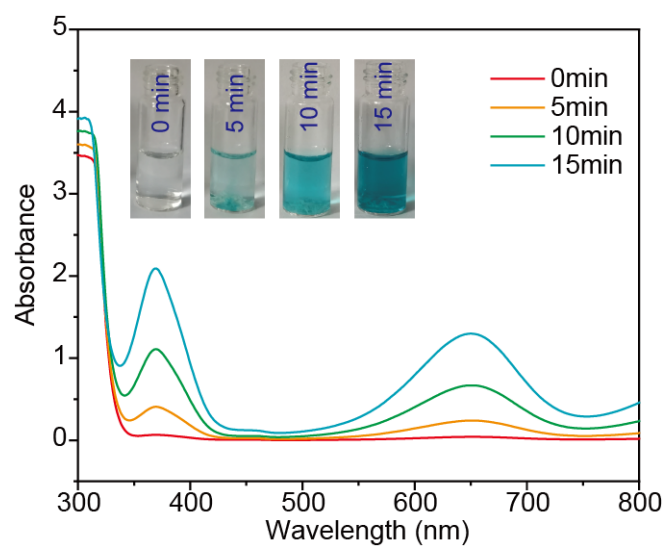

**Fig. S7** UV-Vis absorption spectrum and images at different time (as inset) of the oPD-CA in the TMB- $\text{H}_2\text{O}_2$  solution.

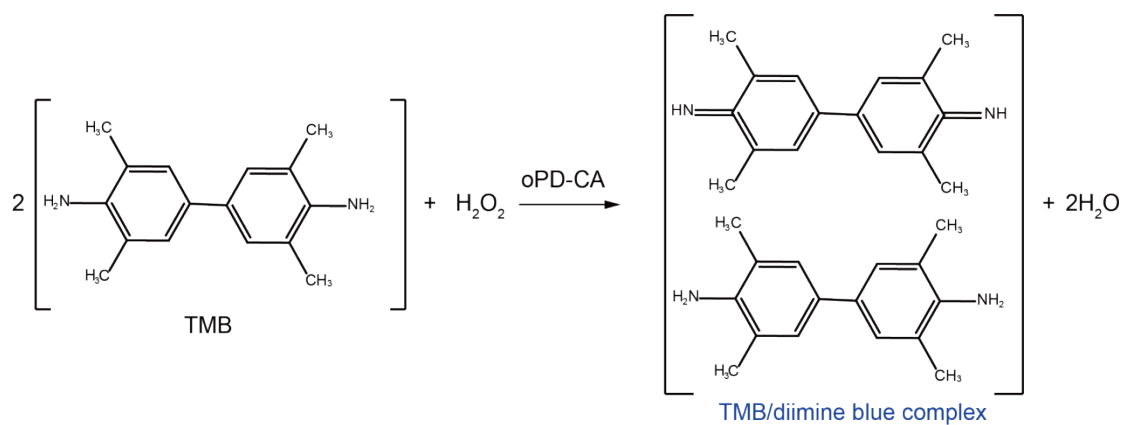

**Fig. S8** The peroxidase-like activity of oPD-CA was revealed by catalysis of colorimetric reaction in the presence of TMB substrate (colorless) and  $\text{H}_2\text{O}_2$  to produce a TMB diimine (blue) product and water.
